# Supplementary material
Source: MDPI journal article supplement (https://www.mdpi.com/2073-4395/14/1/43)
Supplement: s1 [file s1]

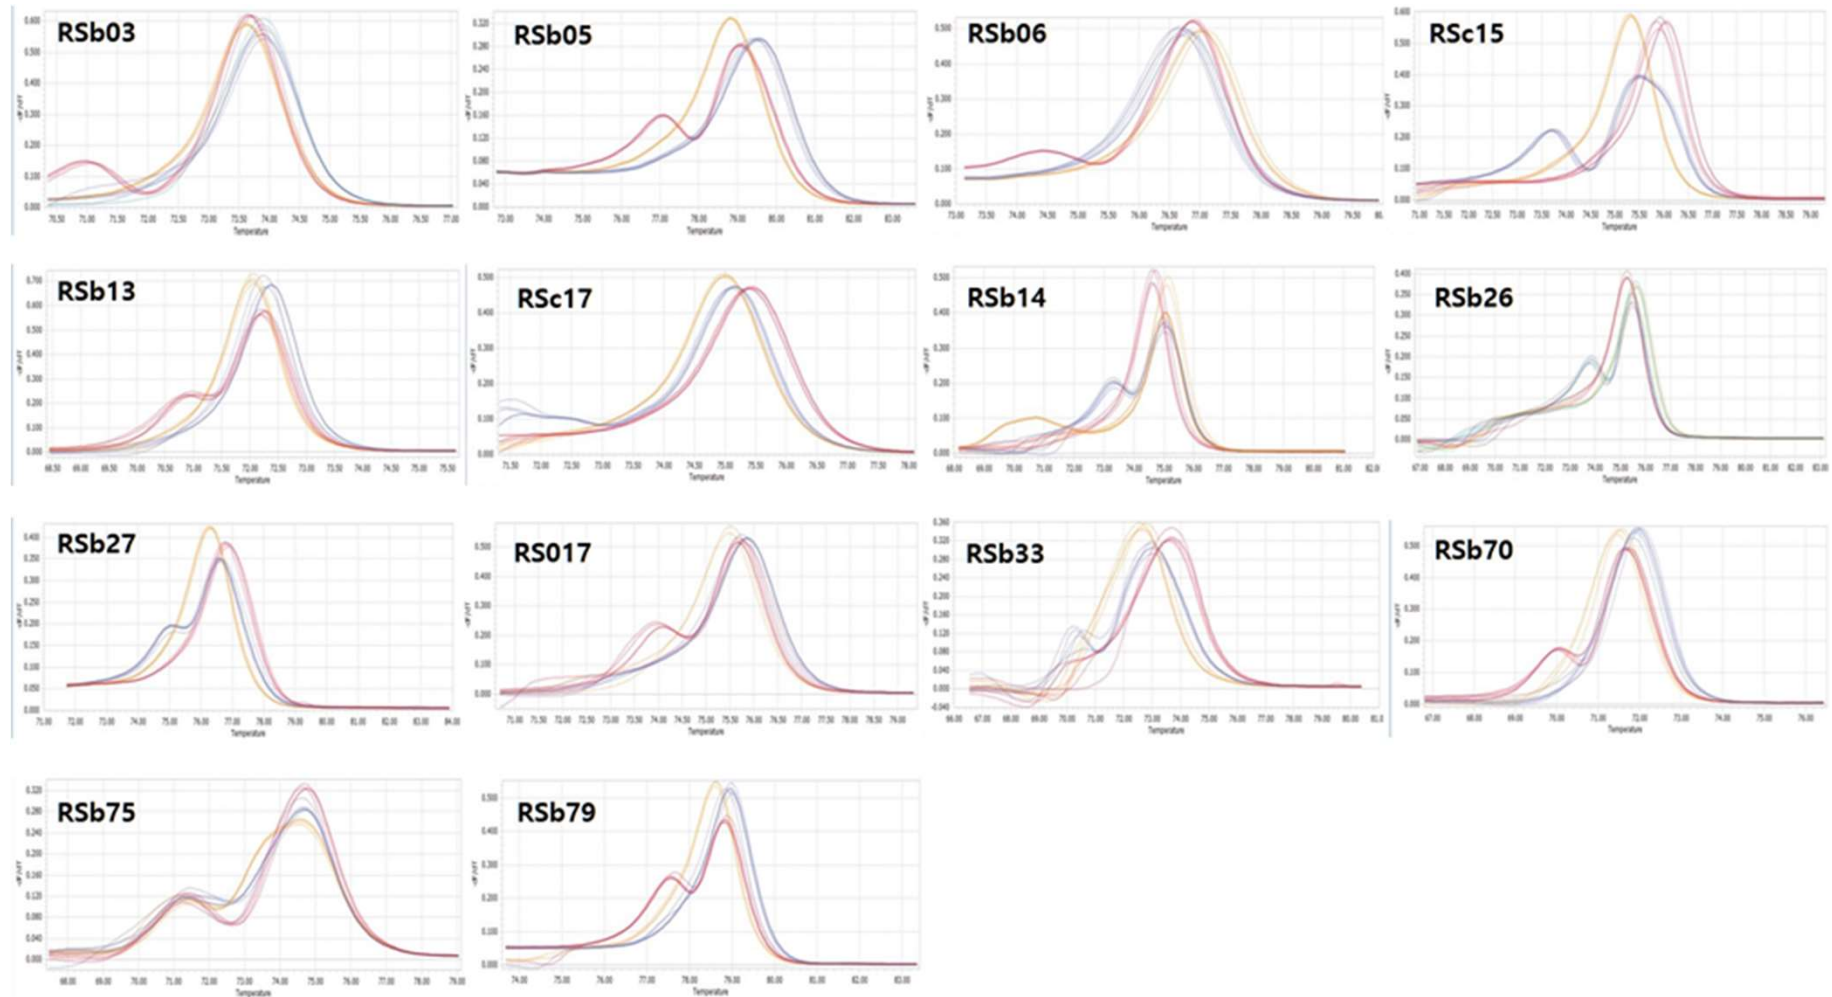

**Figure S1. HRM analysis results using RealTime-PCR for 14 pairs of HRM markers associated with the *Rft* gene. Left peak: B(Rf/Rf), middle peak: H(Rf/rf), right peak: A(rf/rf)**
